# Supplementary material for: Factors associated with time to diagnosis from symptom onset in patients with early rheumatoid arthritis
Source: PubMed Central journal article supplement — Korean J Intern Med. 2017 Dec 15;34(4):910–6. doi: 10.3904/kjim.2017.113 (PMC6610196; doi:10.3904/kjim.2017.113), 2017-12-15
Supplement: kjim-2017-113-suppl.pdf [file kjim-2017-113-suppl.pdf]

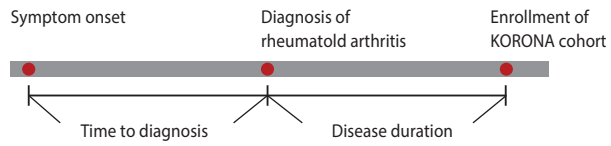

**Supplementary Figure 1.** The definitions of disease duration and time to diagnosis. KORONA, KOrean Observational Study Network for Arthritis.
